# Supplementary material for: Photophysics of pyrene-labelled compounds of biophysical interest
Source: Royal Society of Chemistry journal article supplement (doi:10.1039/b414577c), 2004-12-06
Supplement: b414577c.pdf [file b414577c.pdf]

## Photophysics of Pyrene-labelled Compounds of Biophysical Interest

by

Chunxiang Yao, Heinz-Bernard Kraatz and Ronald P. Steer\*

### Synthesis of Compounds **4** - **12**

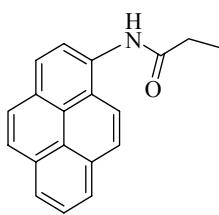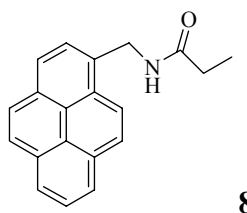

*Synthesis and Characterization of Py-(CH<sub>2</sub>)<sub>n</sub> NH-CO-C<sub>2</sub>H<sub>5</sub> (n = 0 (**4**), n = 1 (**8**)):* Solid HOBt (0.09 g, 0.6 mmol) and EDC (0.12 g, 0.6 mmol) were added successively to a 50 ml well-stirred CH<sub>2</sub>Cl<sub>2</sub> solution of propionic acid (40 μl, 0.5 mmol) in an ice-water bath at 0 °C. After 30 minutes, a solution of 1-aminopyrene (0.13 g, 0.6 mmol) treated by excess Et<sub>3</sub>N in 20 ml CH<sub>2</sub>Cl<sub>2</sub> was added into this reaction mixture. TLC was performed to monitor the progress of the reaction. The reaction solution was stirred vigorously in the dark overnight, at room temperature. Then, the reaction mixture was extracted consecutively with aqueous saturated NaHCO<sub>3</sub>, 10% citric acid, saturated NaHCO<sub>3</sub> and distilled water (100 ml for each aqueous wash). The organic phase was dried over anhydrous Na<sub>2</sub>SO<sub>4</sub> and then evaporated to dryness. After purification by FCC (SiO<sub>2</sub>,

hexane/EtOAc 1:1,  $R_f = 0.44$ ), compound **4** (0.09 g, 64%) was obtained as a yellow solid. Elem. anal. calc. for  $C_{19}H_{25}NO$ : C, 83.52; H, 5.49; N, 5.13; found: C, 83.25; H, 5.42; N, 5.13 %. HRMS (FAB-EI+)  $m/z$  for  $C_{19}H_{25}NO$ : calc. 273.1154, found 273.1157 ( $M^+$ ).  $^1H$ -NMR ( $\delta$  in ppm,  $CDCl_3$ ): 8.19-8.02 (9H, m, CH of Py), 7.78 (1H, br, s, NH close to Py), 2.65, (2H,  $J = 7.5$  Hz,  $CH_2$ ), 1.42 (3H, t,  $J = 6.9$  Hz,  $CH_3$ ).

For compound **8**: Amounts: Propionic acid (75  $\mu$ l, 1.0 mmol), HOBt (0.18 g, 1.2 mmol), EDC (0.23 g, 1.2 mmol), 1-pyrenemethylamine hydrochloride (0.29 g, 1.1 mmol). (hexane/ EtOAc/ MeOH 2: 0.5: 0.5,  $R_f = 0.34$ ). Yellow solid, yield: 0.17 g (60 %). HRMS (FAB-EI+)  $m/z$  for  $C_{20}H_{17}NO$ : calc. 287.1310, found 287.1307 ( $M^+$ ).  $^1H$ -NMR ( $\delta$  in ppm,  $CDCl_3$ ): 8.24-7.78 (9H, m, CH of Py), 5.76 (1H, br, NH), 5.15 (2H, d,  $J = 5.4$  Hz,  $CH_2$  close to Py), 2.25 (2H, q,  $J = 7.5$  Hz,  $CH_2$  close to C=O), 1.19 (3H, t,  $J = 7.5$  Hz,  $CH_3$ ).  $^{13}C\{^1H\}$ -NMR ( $\delta$  in ppm,  $CDCl_3$ ): 173.6 (C=O), 131.4, 120.9, 129.2, 128.4, 127.7, 127.5, 127.4, 126.3, 125.6, 125.5, 124.9, 123.0 (C, CH of Py), 42.2 ( $CH_2$  linking to Py), 29.9 ( $CH_2$  close to C=O), 10.1 ( $CH_3$ ).

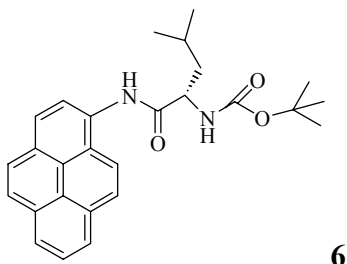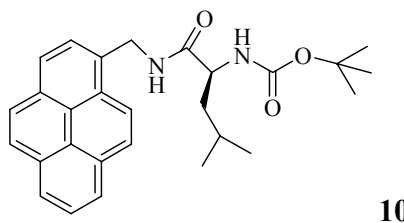

*Synthesis and Characterization of Py-(CH<sub>2</sub>)<sub>n</sub>-CO-Leu-Boc (n = 0 (**6**), n = 1 (**10**)):* To a well-stirred solution of Boc-Leu-OH (0.12 g, 0.5 mmol), HOBt (0.1 g, 0.6 mmol) and EDC (0.12 g, 0.6 mmol) in 50 ml  $CH_2Cl_2$  at 0°C, was added a solution of 1-aminopyrene

(0.13 g, 0.6 mmol) in 20 ml CH<sub>2</sub>Cl<sub>2</sub>. The mixture was stirred in the dark at room temperature overnight, followed by an aqueous work up described above. The crude product was purified by column chromatography (SiO<sub>2</sub>, hexane/ EtOAc 3: 1, R<sub>f</sub> = 0.46) to give compound **6** as a yellow solid in 41% yield (0.09 g, 41%). Elem. Anal.: calc. for C<sub>27</sub>H<sub>30</sub>N<sub>2</sub>O<sub>3</sub>·(0.5 CH<sub>3</sub>COOC<sub>2</sub>H<sub>5</sub>): C, 73.42; H, 7.17; N, 5.91; found: C, 73.95; H, 6.76; N, 6.43 %. HRMS (FAB-EI+) m/z for C<sub>27</sub>H<sub>30</sub>N<sub>2</sub>O<sub>3</sub>: calc. 430.2256, found 430.2259 (M<sup>+</sup>). <sup>1</sup>H-NMR (δ in ppm, CDCl<sub>3</sub>): 9.06 (1H, br, NH close to Py), 8.51-7.96 (9H, m, CH of Py), 5.06 (1H, d, *J* = 6.6 Hz, NH of Leu), 4.48 (1H, m, CH<sup>α</sup> of Leu), 2.04-1.66 (3H, m, CH<sub>2</sub><sup>β</sup> and CH<sup>γ</sup> of Leu), 1.55 (9H, br, s, 3CH<sub>3</sub> of Boc), 1.06 (6H, t, *J* = 6.0 Hz, 2CH<sub>3</sub><sup>δ</sup> of Leu). <sup>13</sup>C{<sup>1</sup>H}-NMR (δ in ppm, CDCl<sub>3</sub>): 172.6, 156.8 (2 C=O), 131.2, 130.7, 130.2, 128.9, 127.5, 127.1, 126.6, 125.9, 125.2, 124.8, 124.7, 124.4, 123.7, 122.2, 120.7 (C, CH of Py), 80.5 (C of Boc), 54.0 (CH<sup>α</sup> of Leu), 41.1 (CH<sub>2</sub><sup>β</sup> of Leu), 28.8 (3CH<sub>3</sub> of Boc), 25.2, 23.3 (2CH<sub>3</sub><sup>δ</sup> of Leu), 22.5 (CH<sup>γ</sup> of Leu).

For Compound **10**: Amounts: 1-pyrenemethylamine hydrochloride (0.29 g, 1.1 mmol), Boc-Leu-OH (0.23g, 1.0 mmol), HOBt (0.17 g, 1.1 mmol), EDC (0.21 g, 1.1 mmol). Column chromatography: SiO<sub>2</sub>, CH<sub>2</sub>Cl<sub>2</sub>/ EtOAc 3: 0.5, R<sub>f</sub> = 0.43. Yield: yellow solid (0.36 g, 82 %). Elem. Anal. calc. for C<sub>28</sub>H<sub>32</sub>N<sub>2</sub>O<sub>3</sub>·(0.5 CH<sub>3</sub>COOC<sub>2</sub>H<sub>5</sub>): C 73.77, H 7.37, N 5.74; found C 73.76, H 7.18, N 6.30 %. HRMS (FAB-EI+) m/z for C<sub>28</sub>H<sub>32</sub>N<sub>2</sub>O<sub>3</sub>: calc. 444.2413, found 444.2407 (M<sup>+</sup>). <sup>1</sup>H-NMR (δ in ppm, CDCl<sub>3</sub>): 8.17-7.95 (9H, m, CH of Py), 6.54 (1H, br, NH close to Py), 5.13 (2H, d, *J* = 4.8 Hz, CH<sub>2</sub> close to Py), 4.84 (1H, br, NH of Leu), 4.11 (1H, m, CH<sup>α</sup> of Leu), 1.78-1.43 (3H, m, CH<sub>2</sub><sup>β</sup> and of CH<sup>γ</sup> Leu), 1.29 (9H, br, s, CH<sub>3</sub> of Boc), 0.90 (6H, d, *J* = 6.0 Hz, CH<sub>3</sub><sup>δ</sup> of Leu). <sup>13</sup>C{<sup>1</sup>H}-NMR (δ in ppm, CDCl<sub>3</sub>): 173.0, 156.0 (2 C=O), 131.3, 131.1, 131.0, 130.8, 128.8, 128.0, 127.4,

126.6, 126.0, 125.3, 124.9, 124.8, 122.8 (C, CH of Py), 80.0 (C of Boc), 53.5 (CH<sup>α</sup> of Leu), 41.7, 41.7 (CH<sub>2</sub> linking to Py and CH<sub>2</sub><sup>β</sup> of Leu), 28.5 (CH<sub>3</sub> of Boc), 25.0, 23.1 (2CH<sub>3</sub><sup>δ</sup> of Leu), 22.3 (CH<sup>γ</sup> of Leu).

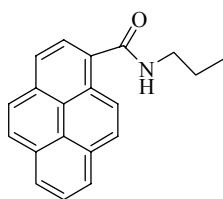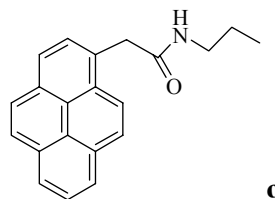

*Synthesis and Characterization of Py-(CH<sub>2</sub>)<sub>n</sub> CO-NH-C<sub>3</sub>H<sub>7</sub> (n = 0 (**5**), n = 1 (**9**)):* 1-pyrenecarboxylic acid (0.25 g, 1.0 mmol), HOBT (0.17 g, 1.1 mmol) and EDC (0.21 g, 1.1 mmol) were added to 50 ml CH<sub>2</sub>Cl<sub>2</sub>. *N*-propylamine (100 μl, 1.2 mmol) was dissolved in 20 ml CH<sub>2</sub>Cl<sub>2</sub>, and added into the reaction mixture and stirred overnight. The work up procedure was identical to that described for compound **4**. The organic residue was then purified by FCC (SiO<sub>2</sub>, hexane/ EtOAc/ MeOH 4: 1.5: 0.5, R<sub>f</sub> = 0.46) to give compound **5** as a yellow solid. Yield: 0.14 g (48 %). HRMS (FAB-EI+) m/z for C<sub>20</sub>H<sub>17</sub>NO: calc. 287.1310, found 287.1306 (M<sup>+</sup>). <sup>1</sup>H-NMR (δ in ppm, CDCl<sub>3</sub>): 8.50-7.95 (9H, m, CH of Py), 6.25 (1H, br.s, NH), 3.56 (2H, q, J = 6.3, 13.2 Hz, CH<sub>2</sub> close to NH), 1.75 (2H, m, CH<sub>2</sub> close to CH<sub>3</sub>), 1.10 (3H, t, J = 7.4 Hz, CH<sub>3</sub>). <sup>13</sup>C{<sup>1</sup>H}-NMR (δ in ppm, CDCl<sub>3</sub>): 170.2 (C=O), 132.5, 131.6, 131.3, 130.9, 128.7, 127.3, 126.5, 125.9, 125.8, 124.9, 124.5 (C, CH of Py), 42.2, 23.3 (2 CH<sub>2</sub>), 11.8 (CH<sub>3</sub>).

For compound **9**: Amounts: 1-pyreneacetic acid (0.26 g, 1.0 mmol), HOBT (0.17 g, 1.1 mmol), EDC (0.21 g, 1.1 mmol), *N*-propylamine (100 μl, 1.2 mmol). Purification by column chromatography: SiO<sub>2</sub>, hexane/ EtOAc 1: 1, R<sub>f</sub> = 0.24). Yield: yellow solid,

71 % yield; 0.21g. Elem. Anal. calc. for C<sub>21</sub>H<sub>19</sub>NO: C, 83.72; H, 6.31; N, 4.65; found: C, 83.79; H, 5.96; N, 4.44 %. HRMS (FAB-EI+) m/z for C<sub>21</sub>H<sub>19</sub>NO: calc. 301.1467, found 301.1469 (M<sup>+</sup>). <sup>1</sup>H-NMR (δ in ppm, CDCl<sub>3</sub>): 8.20-7.92 (9H, m, CH of Py), 5.23 (1H, br., NH), 4.30 (2H, s, CH<sub>2</sub> close to Py), 3.09 (2H, q, *J* = 6.6, 13.8 Hz, CH<sub>2</sub> close to NH), 1.27 (2H, m, CH<sub>2</sub> close to CH<sub>3</sub>), 0.66 (3H, t, *J* = 7.2, 7.5 Hz, CH<sub>3</sub>). <sup>13</sup>C{<sup>1</sup>H}-NMR (δ in ppm, CDCl<sub>3</sub>): 171.2 (C=O), 131.5, 131.1, 131.0, 129.7, 128.8, 128.7, 128.4, 127.7, 127.5, 126.4, 125.7, 125.6, 125.2, 124.8, 123.2 (C, CH of Py), 42.2 (CH<sub>2</sub>), 41.6 (CH<sub>2</sub>), 22.9 (CH<sub>2</sub>), 11.4 (CH<sub>3</sub>).

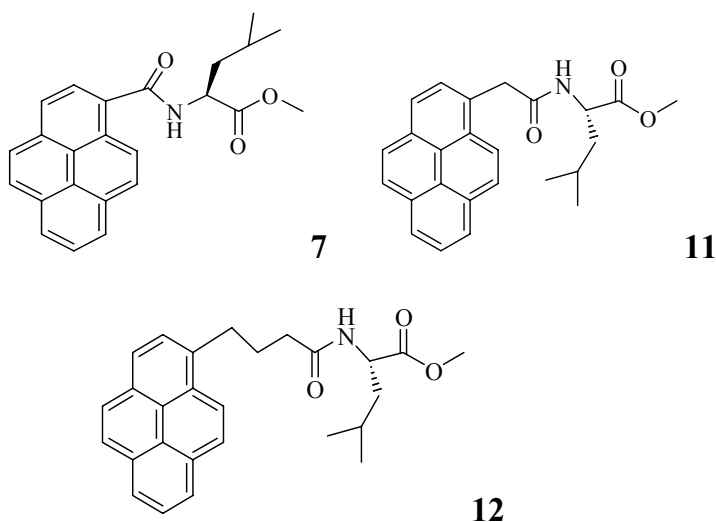

*Synthesis and Characterization of Preparation of Py-(CH<sub>2</sub>)<sub>n</sub>-CO-NH-Leu-OMe (n = 0 (7), n = 1 (11), n = 3 (12)):* To a well-stirred solution of 1-pyrenecarboxylic acid (0.25 g, 1.0 mmol) in 50 ml CH<sub>2</sub>Cl<sub>2</sub>, was added HOBt (0.17 g, 1.1 mmol) and EDC (0.21 g, 1.1 mmol). After 30 minutes, a solution of H-Leu-OMe·HCl (0.20 g, 1.1 mmol) treated with NEt<sub>3</sub> (0.5 mL) in CH<sub>2</sub>Cl<sub>2</sub> (10 mL) was added to the reaction mixture. After stirring overnight, the reaction mixture was worked up using the same procedure as described

above, followed by purification by (SiO<sub>2</sub>, hexane/ EtOAc 3: 1, R<sub>f</sub> = 0.35). Compound **7** was obtained as a yellow solid in 57 % yield (0.21 g). Elem. Anal. calc. for C<sub>24</sub>H<sub>23</sub>NO<sub>3</sub>: C, 77.21; H, 6.17; N, 3.75; found: C, 76.99; H, 5.96; N, 3.82 %. HRMS (FAB-EI+) m/z for C<sub>24</sub>H<sub>23</sub>NO<sub>3</sub>: calc. 373.1678, found 373.1679 (M<sup>+</sup>). <sup>1</sup>H-NMR (δ in ppm, CDCl<sub>3</sub>): 8.21-8.06 (9H, m, CH of Py), 6.51 (1H, d, *J* = 8.7 Hz, NH of Leu), 5.06 (1H, m, CH<sup>α</sup> of Leu), 3.84 (3H, s, OCH<sub>3</sub>), 1.88-1.71 (3H, m, CH<sub>2</sub><sup>β</sup> and CH<sup>γ</sup> of Leu), 1.10, 1.03 (3H, 3H, d, d, *J* = 6.0, 6.0 Hz, 2 CH<sub>3</sub><sup>δ</sup> of Leu). <sup>13</sup>C{<sup>1</sup>H}-NMR (δ in ppm, CDCl<sub>3</sub>): 173.9, 170.0 (2C=O), 132.9, 131.3, 130.9, 130.5, 129.0, 128.9, 127.3, 126.5, 126.0, 125.9, 124.9, 124.6, 124.4 (C, CH of Py), 52.9 (CH<sup>α</sup> of Leu), 51.7 (OCH<sub>3</sub>), 41.9 (CH<sub>2</sub><sup>β</sup> of Leu), 25.4 (CH<sup>γ</sup> of Leu), 23.2, 22.3 (2 CH<sub>3</sub><sup>δ</sup> of Leu).

For compound **11**: Amounts: 1-pyreneacetic acid (0.26 g, 1.0 mmol), HOBt (0.17 g, 1.1 mmol), EDC (0.21 g, 1.1 mmol), H-Leu-OMe-HCl (0.20 g, 1.1 mmol). CH<sub>2</sub>Cl<sub>2</sub>/EtOAc 3:0.5, R<sub>f</sub> = 0.39. Yellow solid. Yield: 62 %, 0.24 g. Elem. Anal. calc. for C<sub>25</sub>H<sub>25</sub>NO<sub>3</sub>: C, 77.52; H, 6.46; N, 3.62; found: C, 77.41; H, 6.45; N, 3.30 %. HRMS (FAB-EI+) m/z for C<sub>25</sub>H<sub>25</sub>NO<sub>3</sub>: calc. 387.1834, found 387.1835 (M<sup>+</sup>). <sup>1</sup>H-NMR (δ in ppm, CDCl<sub>3</sub>): 8.20-7.96 (9H, m, CH of Py), 5.59 (1H, d, *J* = 7.2 Hz, NH), 4.62 (1H, m, CH of Leu close to NH), 4.33 (2H, d, *J* = 4.5 Hz, CH<sub>2</sub> near Py), 3.65 (3, s, OCH<sub>3</sub>), 1.46-1.19 (3H, m, CH<sub>2</sub><sup>β</sup> and CH<sup>γ</sup> of Leu), 0.76, 0.67 (3H, 3H, d, d, *J* = 6.3, 6.4 Hz, 2CH<sub>3</sub><sup>δ</sup> of Leu). <sup>13</sup>C{<sup>1</sup>H}-NMR (δ in ppm, CDCl<sub>3</sub>): 173.4, 171.1 (2 C=O), 131.5, 131.2, 131.0, 128.6, 128.4, 128.3, 127.7, 127.5, 126.3, 125.6, 125.5, 125.3, 124.8, 123.3 (C, CH of Py), 52.4 (CH<sup>α</sup> of Leu), 51.1 (OCH<sub>3</sub>), 41.8, 41.3 (CH<sub>2</sub> near Py and CH<sub>2</sub><sup>β</sup> of Leu), 25.0 (CH<sup>γ</sup> of Leu), 22.9, 22.0 (2 CH<sub>3</sub><sup>δ</sup> of Leu).

For compound **12**: Amounts: 1-pyrenebutyric acid (0.29 g, 1.0 mmol), HOBT (0.17 g, 1.1 mmol), EDC (0.21 g, 1.1 mmol), H-Leu-OMe·HCl (0.20 g, 1.1 mmol). hexane/EtOAc/ MeOH 2:0.5:0.5,  $R_f = 0.67$ . Yellow solid. Yield: 37 %, 0.15 g. Elem. anal. calc. for  $C_{27}H_{29}NO_3$ : C, 78.07; H, 6.99; N, 3.37; found: C, 77.86; H, 7.08; N, 3.49 %. HRMS (FAB-EI+)  $m/z$  for  $C_{27}H_{29}NO_3$ : calc. 415.2147, found 415.2149 ( $M^+$ ).  $^1H$ -NMR ( $\delta$  in ppm,  $CDCl_3$ ): 8.15-7.80 (9H, m, CH of Py), 5.84 (1H, d,  $J = 8.1$  Hz, NH of Leu), 4.69 (1H, m,  $CH^\square$  of Leu), 3.73 (3H, s,  $OCH_3$ ), 3.40 (2H, t,  $J = 6.6, 7.2$  Hz,  $CH_2$  linked to Py), 2.36-2.22 (4H, m, 2  $CH_2$  close to Py), 1.69-1.48 (3H, m,  $CH_2^\beta$  and  $CH^\gamma$  of Leu), 0.94 (6H, dd,  $J = 6.3, 7.2$  Hz, 2  $CH_3^\delta$  of Leu).  $^{13}C\{^1H\}$ -NMR ( $\delta$  in ppm,  $CDCl_3$ ): 174.0, 172.9 (2 C=O), 136.1, 131.6, 131.1, 130.1, 129.0, 127.7, 127.6, 127.0, 126.1, 125.3, 125.1, 125.0, 125.0, 123.6 (C, CH of Py), 52.5, 50.9 ( $CH^\alpha$  of Leu and  $OCH_3$ ), 41.8, 36.0, 32.9, 27.6 ( $CH_2$ ), 25.2 ( $CH^\gamma$  of Leu), 23.1, 22.2 (2  $CH_3^\delta$  of Leu).
